# Supplementary material for: Improved efficiency of an herbicide combining bentazone and terbuthylazine – can weeds be controlled with better environmental safety?
Source: Royal Society of Chemistry journal article supplement (doi:10.1039/d2va00036a), 2022-01-01
Supplement: d2va00036a1.pdf [file d2va00036a1.pdf]

## SUPPLEMENTARY INFORMATION

### Improved efficiency of an herbicide combining bentazone and terbuthylazine – can weeds be controlled with better environmental safety?

Libânia Queirós, Sirine Bouguerra, Ruth Pereira, Inês P. E. Macário, Joana I. Santos, Telma Veloso, Fernando J.M. Gonçalves, Patrícia Pereira, Joana Luísa Pereira

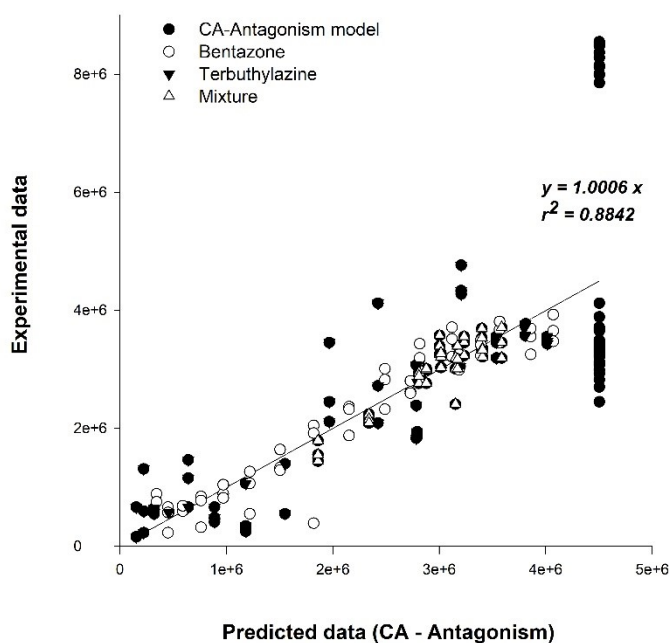

**Figure S1.** Regression between the experimental responses obtained in the mixture assay with *Raphidocelis subcapitata* and corresponding data predicted by the reference CA–Antagonism model following the integration of single-herbicide concentration-response experimental data.

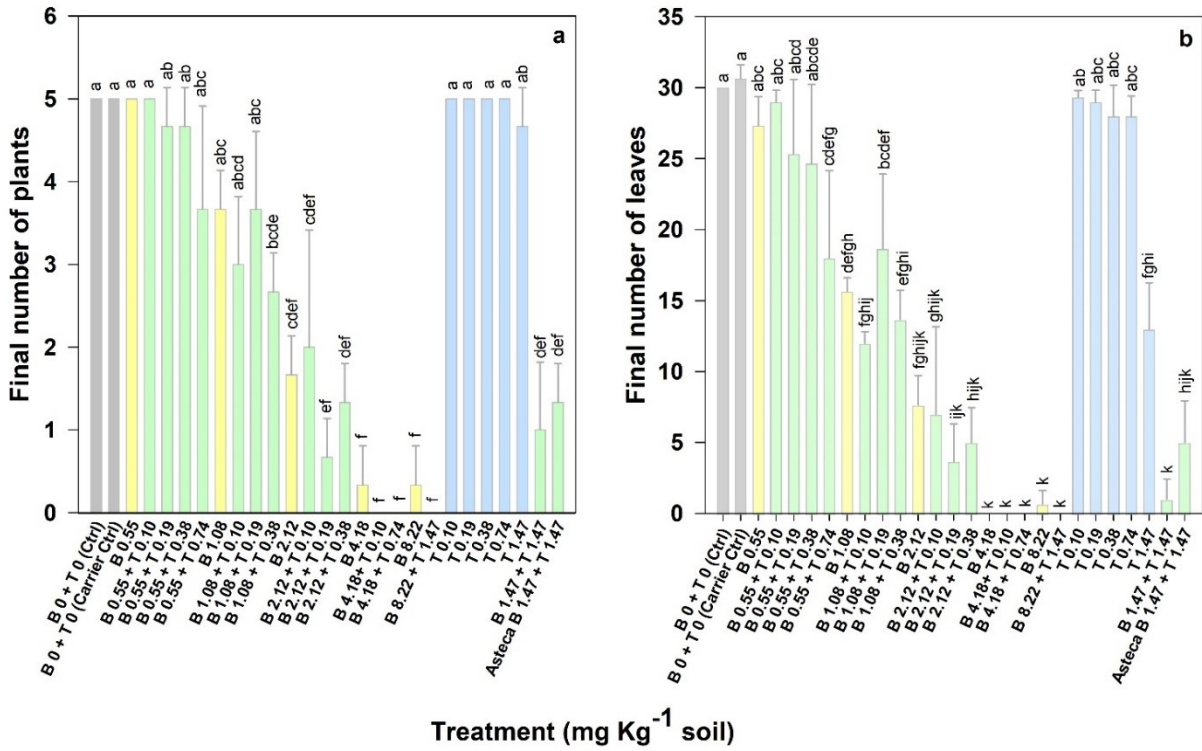

**Figure S2.** Final number of plants (a) and leaves (b) of *Brassica napus* following a 14-days exposure period to bentazone (B) and terbuthylazine (T), singly and in mixture, or to Asteca® Mays diluted to the same concentration tested in one of the mixture treatments. The bars stand for the average of three replicates and the error bars for the respective standard error. Significant differences are presented for each treatment (Tukey’s test,  $p < 0.05$ ) using low-case letters.

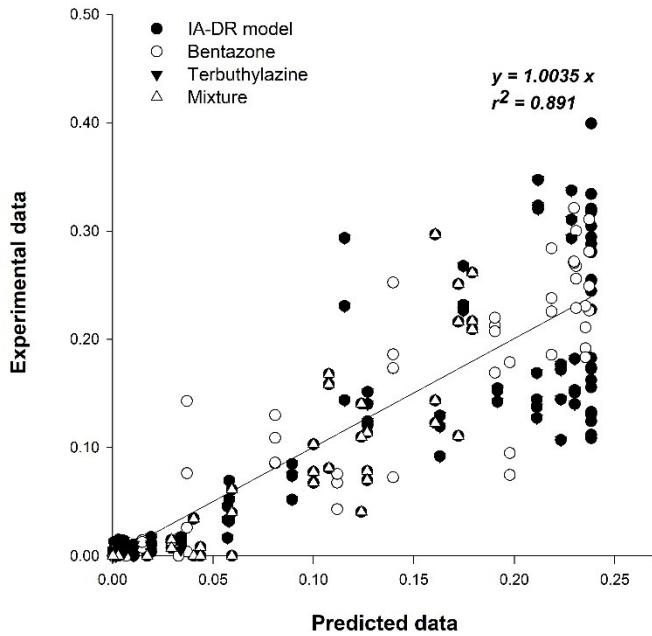

**Figure S3.** Regression between the experimental responses obtained in the mixture assay with *Brassica napus* and corresponding data predicted by the reference IA – Dose ratio model following the integration of single-herbicide concentration-response experimental data.

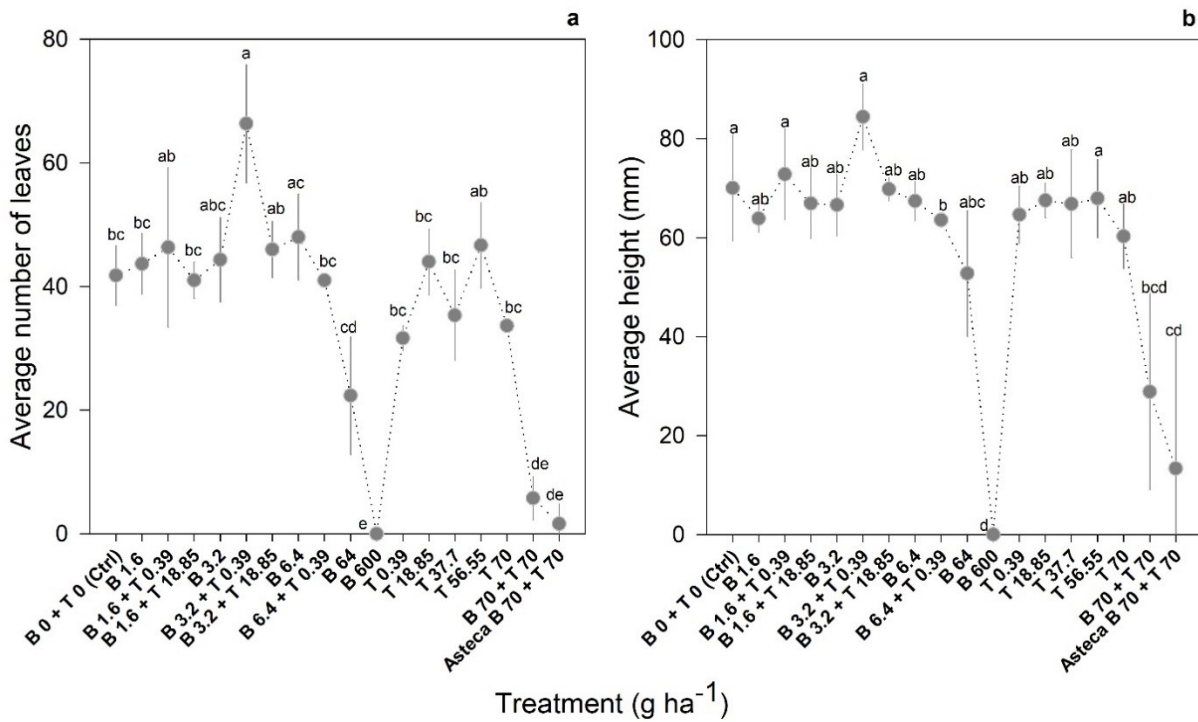

**Figure S4.** Final total number of leaves (a) and height (b) of *Portulaca oleracea* following a 28-days exposure period to bentazone (B) and terbutylazine (T), singly and in mixture, or to Asteca® Mays diluted to the same concentration tested in one of the other treatments. The marks represent the average of three replicates and the error bars stand for the respective standard error. Significant differences among treatments (Tukey's test,  $p < 0.05$ ) are presented using low-case letters.

**Table S1.** Concentrations of bentazone (B) and terbuthylazine (T) tested in single/mixture exposures with aquatic (*Lemna gibba*, *Raphidocelis subcapitata*) and terrestrial (*Triticum aestivum*, *Brassica napus*) non-target organisms. Concentrations are given in  $\mu\text{g L}^{-1}$  (aquatic tests) or  $\text{mg Kg}^{-1}$  d.w. (soil tests), as well as in dimensionless Toxic Units (TU) scaling in the specific case of mixtures testing. The treatment in bold corresponds to the commercial formulation Asteca® Mays that was diluted to the same concentrations of B and T as tested in another mixture treatment.

| Non-target organisms' exposures |                      |                                 |                      |              |                      |              |                          |                          |                          |                       |                          |              |                          |              |              |              |
|---------------------------------|----------------------|---------------------------------|----------------------|--------------|----------------------|--------------|--------------------------|--------------------------|--------------------------|-----------------------|--------------------------|--------------|--------------------------|--------------|--------------|--------------|
| Aquatic                         |                      |                                 |                      |              |                      |              |                          | Terrestrial              |                          |                       |                          |              |                          |              |              |              |
| <i>Lemna gibba</i>              |                      | <i>Raphidocelis subcapitata</i> |                      |              |                      |              |                          | <i>Triticum aestivum</i> |                          | <i>Brassica napus</i> |                          |              |                          |              |              |              |
| Single                          | Single               |                                 | Mixture              |              |                      |              | $\Sigma$ TU              | Single                   |                          | Single                |                          | Mixture      |                          |              |              |              |
| B                               | B                    | T*                              | B                    |              | T                    |              |                          | B                        | T                        | B                     | T                        | B            |                          | T            |              |              |
| $\mu\text{g L}^{-1}$            | $\mu\text{g L}^{-1}$ |                                 | $\mu\text{g L}^{-1}$ | TU           | $\mu\text{g L}^{-1}$ | TU           | $\text{mg Kg}^{-1}$ d.w. |                          | $\text{mg Kg}^{-1}$ d.w. |                       | $\text{mg Kg}^{-1}$ d.w. | TU           | $\text{mg Kg}^{-1}$ d.w. | TU           | $\Sigma$ TU  |              |
| 0                               | 0                    | 0                               | 0                    | 0.000        | 0.000                | 0.000        | 0.000                    | 0.00                     | 0.00                     | 0.00                  | 0.00                     | 0.000        | 0.000                    | 0.000        | 0.000        | 0.000        |
| 900                             | 2000                 | 15                              | 0                    | 0.000        | 6.631                | 0.239        | 0.239                    | 0.40                     | 0.83                     | 0.23                  | 0.09                     | 0.000        | 0.000                    | 0.098        | 0.136        | 0.136        |
| 1440                            | 2400                 | 20                              | 0                    | 0.000        | 8.727                | 0.315        | 0.315                    | 0.55                     | 1.16                     | 0.35                  | 0.13                     | 0.000        | 0.000                    | 0.192        | 0.268        | 0.268        |
| 2304                            | 2880                 | 25                              | 0                    | 0.000        | 11.486               | 0.414        | 0.414                    | 0.77                     | 1.63                     | 0.52                  | 0.20                     | 0.000        | 0.000                    | 0.378        | 0.528        | 0.528        |
| 3686                            | 3456                 | 33                              | 0                    | 0.000        | 15.116               | 0.545        | 0.545                    | 1.08                     | 2.28                     | 0.78                  | 0.29                     | 0.000        | 0.000                    | 0.744        | 1.040        | 1.040        |
| 5898                            | 4147                 | 43                              | 0                    | 0.000        | 19.894               | 0.717        | 0.717                    | 1.52                     | 3.19                     | 1.17                  | 0.44                     | 0.000        | 0.000                    | 1.465        | 2.046        | 2.046        |
| 9437                            | 4977                 | 56                              | 1009                 | 0.257        | 0.000                | 0.000        | 0.257                    | 2.13                     | 4.46                     | 1.76                  | 0.66                     | 0.548        | 0.271                    | 0.000        | 0.000        | 0.271        |
| 15099                           | 5972                 | 72                              | 1328                 | 0.338        | 0.000                | 0.000        | 0.338                    | 2.98                     | 6.25                     | 2.63                  | 0.99                     | 1.078        | 0.534                    | 0.000        | 0.000        | 0.534        |
|                                 | 7166                 | 94                              | 1747                 | 0.445        | 0.000                | 0.000        | 0.445                    | 4.17                     | 8.75                     | 3.95                  | 1.48                     | 2.122        | 1.050                    | 0.000        | 0.000        | 1.050        |
|                                 | 8600                 | 122                             | 2300                 | 0.585        | 0.000                | 0.000        | 0.585                    | 5.83                     | 12.24                    | 5.93                  | 2.22                     | 4.176        | 2.066                    | 0.000        | 0.000        | 2.066        |
|                                 | 10320                | 159                             | 3026                 | 0.770        | 0.000                | 0.000        | 0.770                    | 8.17                     | 17.14                    | 8.89                  | 3.34                     | 8.219        | 4.067                    | 0.000        | 0.000        | 4.067        |
|                                 | 12383                | 207                             | 1009                 | 0.257        | 6.630                | 0.239        | 0.496                    | 11.43                    | 24.00                    | 13.33                 | 5.00                     | 0.548        | 0.271                    | 0.098        | 0.136        | 0.408        |
|                                 | 14860                | 269                             | 1328                 | 0.338        | 6.630                | 0.239        | 0.577                    |                          |                          | 20.00                 | 7.51                     | 1.078        | 0.534                    | 0.098        | 0.136        | 0.670        |
|                                 | 17832                |                                 | 1747                 | 0.445        | 6.630                | 0.239        | 0.684                    |                          |                          | 30.00                 | 11.26                    | 2.122        | 1.050                    | 0.098        | 0.136        | 1.186        |
|                                 |                      |                                 | 2300                 | 0.585        | 6.630                | 0.239        | 0.824                    |                          |                          |                       | 16.89                    | 4.176        | 2.066                    | 0.098        | 0.136        | 2.203        |
|                                 |                      |                                 | 1009                 | 0.257        | 8.727                | 0.315        | 0.571                    |                          |                          |                       | 25.33                    | 0.548        | 0.271                    | 0.192        | 0.268        | 0.540        |
|                                 |                      |                                 | 1328                 | 0.338        | 8.727                | 0.315        | 0.652                    |                          |                          |                       | 38.00                    | 1.078        | 0.534                    | 0.192        | 0.268        | 0.802        |
|                                 |                      |                                 | 1747                 | 0.445        | 8.727                | 0.315        | 0.759                    |                          |                          |                       |                          | 2.122        | 1.050                    | 0.192        | 0.268        | 1.318        |
|                                 |                      |                                 | 1009                 | 0.257        | 11.486               | 0.414        | 0.671                    |                          |                          |                       |                          | 0.548        | 0.271                    | 0.378        | 0.528        | 0.799        |
|                                 |                      |                                 | 1328                 | 0.338        | 11.486               | 0.414        | 0.752                    |                          |                          |                       |                          | 1.078        | 0.534                    | 0.378        | 0.528        | 1.062        |
|                                 |                      |                                 | 1747                 | 0.445        | 11.486               | 0.414        | 0.858                    |                          |                          |                       |                          | 2.122        | 1.050                    | 0.378        | 0.528        | 1.578        |
|                                 |                      |                                 | 1009                 | 0.257        | 15.116               | 0.545        | 0.801                    |                          |                          |                       |                          | 0.548        | 0.271                    | 0.744        | 1.040        | 1.311        |
|                                 |                      |                                 | 2300                 | 0.585        | 15.116               | 0.545        | 1.130                    |                          |                          |                       |                          | 4.176        | 2.066                    | 0.744        | 1.040        | 3.106        |
|                                 |                      |                                 | 3026                 | 0.770        | 19.894               | 0.717        | 1.487                    |                          |                          |                       |                          | 8.219        | 4.067                    | 1.465        | 2.046        | 6.113        |
|                                 |                      |                                 | 30.000               | 0.008        | 0.000                | 0.000        | 0.008                    |                          |                          |                       |                          |              |                          |              |              |              |
|                                 |                      |                                 | 0.000                | 0.000        | 30.000               | 1.081        | 1.081                    |                          |                          |                       |                          |              |                          |              |              |              |
|                                 |                      |                                 | 30.000               | 0.008        | 30.000               | 1.081        | 1.089                    |                          |                          |                       |                          | 1.465        | 0.725                    | 1.465        | 2.046        | 2.771        |
|                                 |                      |                                 | <b>30.000</b>        | <b>0.008</b> | <b>30.000</b>        | <b>1.081</b> | <b>1.089</b>             |                          |                          |                       |                          | <b>1.465</b> | <b>0.725</b>             | <b>1.465</b> | <b>2.046</b> | <b>2.771</b> |

\*Test made in a previous study of Queirós et al. (2018b) that was considered to plan the mixture assay performed herein

**Table S2.** Application doses ( $\text{g ha}^{-1}$ ) of bentazone (B) and terbuthylazine (T) tested in the mixture assay with the target weed *Portulaca oleracea*. Predicted environmental concentrations (PECs) corresponding to these application doses are given in  $\mu\text{g L}^{-1}$  (surface water) or  $\text{mg Kg}^{-1}$  d.w. (soil). One of the tested application doses of T results in  $\text{PEC}_{\text{water}}$  equal to the  $\text{EC}_{20}$  value calculated for *Raphidocelis subcapitata* in the single toxicity test, as indicated within brackets. The treatment in bold corresponds to the commercial formulation Asteca® Mays that was diluted to the same concentrations of B and T as tested in another mixture treatment.

| Target weed exposure ( <i>Portulaca oleracea</i> ) |                             |                            |                  |                             |                            |
|----------------------------------------------------|-----------------------------|----------------------------|------------------|-----------------------------|----------------------------|
| Mixture                                            |                             |                            |                  |                             |                            |
| B                                                  |                             |                            | T                |                             |                            |
| Application dose                                   | $\text{PEC}_{\text{water}}$ | $\text{PEC}_{\text{soil}}$ | Application dose | $\text{PEC}_{\text{water}}$ | $\text{PEC}_{\text{soil}}$ |
| 0.00                                               | 0.00                        | 0.00                       | 0.00             | 0.00                        | 0.00                       |
| 1.60                                               | 0.53                        | 0.01                       | 0.00             | 0.00                        | 0.00                       |
| 3.20                                               | 1.05                        | 0.02                       | 0.00             | 0.00                        | 0.00                       |
| 6.40                                               | 2.11                        | 0.05                       | 0.00             | 0.00                        | 0.00                       |
| 64.00                                              | 21.09                       | 0.48                       | 0.00             | 0.00                        | 0.00                       |
| 600.00**                                           | 197.76                      | 4.50                       | 0.00             | 0.00                        | 0.00                       |
| 0.00                                               | 0.00                        | 0.00                       | 0.39             | 0.11                        | 0.00                       |
| 0.00                                               | 0.00                        | 0.00                       | 18.85            | 5.40                        | 0.14                       |
| 0.00                                               | 0.00                        | 0.00                       | 37.70            | ( $\text{EC}_{20}$ ) 10.82  | 0.28                       |
| 0.00                                               | 0.00                        | 0.00                       | 56.55            | 16.21                       | 0.42                       |
| 0.00                                               | 0.00                        | 0.00                       | 70.00            | 20.07                       | 0.53                       |
| 1.60                                               | 0.53                        | 0.01                       | 0.39             | 0.11                        | 0.00                       |
| 1.60                                               | 0.53                        | 0.01                       | 18.85            | 5.40                        | 0.14                       |
| 3.20                                               | 1.05                        | 0.02                       | 0.39             | 0.11                        | 0.00                       |
| 3.20                                               | 1.05                        | 0.02                       | 18.85            | 5.40                        | 0.14                       |
| 6.40                                               | 2.11                        | 0.05                       | 0.39             | 0.11                        | 0.00                       |
| 70.00                                              | 23.07                       | 0.53                       | 70.00            | 20.07                       | 0.53                       |
| <b>70.00</b>                                       | <b>23.07</b>                | <b>0.53</b>                | <b>70.00</b>     | <b>20.07</b>                | <b>0.53</b>                |

\*\*Recommended application dose of T in the commercial formulation

**Table S3.** Values used to complete the parametrization required at step 1/2 of the FOCUS Surface water tool (Linders *et al.*, 2001) and PERSAM Soil tool (EFSA, 2015; Gardi *et al.*, 2011; Hiederer, 2012) for estimating PEC values in surface water and in soil, respectively, according with the pesticide

application doses. Substance specific chemical data was retrieved from (EFSA, 2011) for terbuthylazine and (EFSA, 2015b) for bentazone.

|                                                                                                        | FOCUS surface water, step 1                             | PERSAM soil, step 1          |       |
|--------------------------------------------------------------------------------------------------------|---------------------------------------------------------|------------------------------|-------|
| <b>Bentazone</b>                                                                                       | Molecular weight (g mol <sup>-1</sup> )                 | —                            | 240.3 |
|                                                                                                        | Water solubility (g L <sup>-1</sup> )                   | 0.570                        | —     |
|                                                                                                        | K <sub>OC</sub> /K <sub>foc</sub> (L kg <sup>-1</sup> ) | 30.2                         | 30.2  |
|                                                                                                        | DT <sub>50</sub> in soil (days)                         | 7.5                          | 7.5   |
|                                                                                                        | DT <sub>50</sub> in water/sediment system (days)        | 242                          | —     |
|                                                                                                        | DT <sub>50</sub> in water (days)                        | 242                          | —     |
|                                                                                                        | DT <sub>50</sub> in sediment (days)                     | 242                          | —     |
|                                                                                                        | K <sub>om</sub> (mL g <sup>-1</sup> )                   | —                            | 17.52 |
|                                                                                                        | E (KJ mol <sup>-1</sup> )                               | —                            | 65.4  |
| Application pattern (crop, region and season of application, number of applications <i>per</i> season) | Maize, Southern Europe, spring, 1 app/season            | South, annual crop           |       |
| t <sub>avg</sub> (days; averaging time)                                                                | —                                                       | 0                            |       |
| t <sub>PostApp</sub> (days; time post-application)                                                     | —                                                       | 0                            |       |
| Z <sub>eco</sub> (total soil; cm; Ecotoxicological averaging depth)                                    | —                                                       | 5                            |       |
| Application doses (g ha <sup>-1</sup> )                                                                | 1, 2, 20, 200, 400, 600, 800, 1000, 1200                | 20, 200, 400, 600, 800, 1000 |       |
| <b>Terbuthylazine</b>                                                                                  | Molecular weight (g mol <sup>-1</sup> )                 | —                            | 229.7 |
|                                                                                                        | Water solubility (g L <sup>-1</sup> )                   | 0.0085                       | —     |
|                                                                                                        | K <sub>OC</sub> /K <sub>foc</sub> (L kg <sup>-1</sup> ) | 151                          | 151   |
|                                                                                                        | DT <sub>50</sub> in soil (days)/DgT50 (days)            | 19.4                         | 19.4  |
|                                                                                                        | DT <sub>50</sub> in water/sediment system (days)        | 69.9                         | —     |
|                                                                                                        | DT <sub>50</sub> in water (days)                        | 1000                         | —     |
|                                                                                                        | DT <sub>50</sub> in sediment (days)                     | 69.9                         | —     |
|                                                                                                        | K <sub>om</sub> (mL g <sup>-1</sup> )                   | —                            | 87.59 |
|                                                                                                        | E (KJ mol <sup>-1</sup> )                               | —                            | 65.4  |
| Application pattern (crop, region and season of application, number of applications <i>per</i> season) | Maize, Southern Europe, spring, 1 app/season            | South, annual crop           |       |
| t <sub>avg</sub> (days; averaging time)                                                                | —                                                       | 0                            |       |

|                                                                     |                                          |                              |
|---------------------------------------------------------------------|------------------------------------------|------------------------------|
| $t_{\text{PostApp}}$ (days; time post-application)                  | —                                        | 0                            |
| $Z_{\text{eco}}$ (total soil; cm; Ecotoxicological averaging depth) | —                                        | 5                            |
| Application doses ( $\text{g ha}^{-1}$ )                            | 1, 2, 20, 200, 400, 600, 800, 1000, 1200 | 20, 200, 400, 600, 800, 1000 |

**Table S4.** ECx values calculated in the mixture assays with the non-target aquatic and terrestrial representatives (*Raphidocelis subcapitata* and *Brassica napus*, respectively) and respective conversion to application rates, by assuming that estimated ECx correspond to hypothetical predicted environmental concentrations (PECs) of bentazone and terbuthylazine in surface water and soil.

|                                                             | <b>Bentazone</b> |                                          | <b>Terbuthylazine</b> |                                          |        |
|-------------------------------------------------------------|------------------|------------------------------------------|-----------------------|------------------------------------------|--------|
|                                                             | ECx (PECs)       | Application rates ( $\text{g ha}^{-1}$ ) | ECx (PECs)            | Application rates ( $\text{g ha}^{-1}$ ) |        |
| <i>Raphidocelis subcapitata</i><br>( $\mu\text{g L}^{-1}$ ) | EC <sub>1</sub>  | 242.124                                  | 734.600               | 1.221                                    | 4.259  |
|                                                             | EC <sub>5</sub>  | 680.882                                  | 2065.783              | 3.891                                    | 13.572 |
|                                                             | EC <sub>10</sub> | 1036.690                                 | 3145.297              | 6.23                                     | 21.741 |
|                                                             | EC <sub>20</sub> | 1695.313                                 | 5142.597              | 10.815                                   | 37.722 |
|                                                             | EC <sub>50</sub> | 3930.097                                 | 11923.838             | 27.749                                   | 96.788 |
| <i>Brassica napus</i><br>( $\text{mg Kg}^{-1}$ D.W.)        | EC <sub>1</sub>  | 0.327                                    | 43.600                | 0.039                                    | 5.200  |
|                                                             | EC <sub>5</sub>  | 0.643                                    | 85.733                | 0.115                                    | 15.333 |
|                                                             | EC <sub>10</sub> | 0.846                                    | 112.800               | 0.179                                    | 23.867 |
|                                                             | EC <sub>20</sub> | 1.167                                    | 155.600               | 0.298                                    | 39.733 |
|                                                             | EC <sub>50</sub> | 2.021                                    | 269.467               | 0.716                                    | 95.467 |
| Dose recommended in Asteca® Mays                            | 4.500            | 600.000                                  | 4.500                 | 600.000                                  |        |

## References

- EFSA, 2015a. European Food Safety Authority (EFSA) Data & PERSAM software tool [WWW Document]. URL <https://esdac.jrc.ec.europa.eu/content/european-food-safety-authority-efsa-data-persam-software-tool>
- EFSA, 2015b. Conclusion on the peer review of the pesticide risk assessment of the active substance bentazone. *EFSA J.* 13, 1–153. <https://doi.org/10.2903/j.efsa.2015.4077>
- EFSA, 2011. Conclusion on the peer review of the pesticide risk assessment of the active substance terbuthylazine. *EFSA J.* 9, 1–133. <https://doi.org/10.2903/j.efsa.2011.1969>.
- European Food Safety Authority, 2011. Conclusion on the peer review of the pesticide risk assessment of the active substance terbuthylazine. *EFSA J.* 9, 1969. <https://doi.org/10.2903/j.efsa.2011.1969>.
- Gardi, C., Montanarella, L., Panagos, P., Micale, F., 2011. Report on the activities realized in 2010 within the Service Level Agreement between JRC and EFSA, as a support of the FATE and Ecoregions working groups of EFSA PPR (SLA EFSA-JRC/2008/01). *EFSA Support. Publ.* 8. <https://doi.org/10.2903/sp.efsa.2011.EN-112>
- Hiederer, R., 2012. *EFSA Spatial Data Version 1.1 Data Properties and Processing*. Publications Office of the European Union EUR 25546. <https://doi.org/10.2788/54453>
- Linders, J., Adriaanse, P., Allen, R., Capri, E., Gouy, V., Hollis, J., Jarvis, N., Klein, M., Lolos, P., Maier, W.M., Maund, S., Pais, C., Russell, M., Smeets, L., Teixeira, J.L., Vizantinopoulos, S., Yon, D., 2001. “FOCUS Surface Water Scenarios in the EU Evaluation Process under 91/414/EEC”.
